# Supplementary material for: Omeprazole Inhibits Glioblastoma Cell Invasion and Tumor Growth
Source: MDPI journal article supplement (doi:10.3390/cancers12082097), 2020-07-28
Supplement: s1 [file s1]

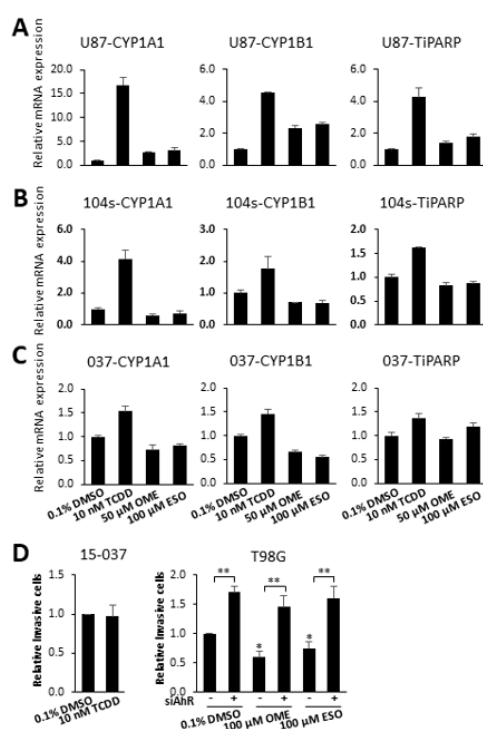

**Figure S1.** Effects of TCDD, OME, and ESO on induction of Ah-responsive genes. Effects of DMSO (set at 1.0), 10 nM TCDD, 50 μM OME, and 100 μM ESO on gene expression in U87-MG (A), 14-014s (B), and 15-037 (C) GBM cell lines were determined by real time PCR as outlined in the Methods. Effects of TCDD on 15-037 cells (D, left) and effects of OME and ESO on T98G cells (D, right) was determined in a Boyden chamber assay and results were quantitated as outlined in the Methods. Results are expressed as means ± SD for at least 3 separate determinations per treatment group and significant ( $p < 0.05$ ) inhibition by ESO and OME (\*) and reversal of these effects after AhR knockdown (\*\*) are indicated.

**Table S1.** Antibody and Reagents.

| Type     | Name                           | Company            | Cat #              |
|----------|--------------------------------|--------------------|--------------------|
| Antibody | AhR                            | Enzo Life Sciences | BML-SA210          |
|          | GAPDH                          | Cell Signaling     | 5174               |
| siRNA    | Negative control               | Qiagen             | 1027281            |
|          | siAhR                          | Sigma              | SASI_Hs02_00332181 |
| Chemical | 4-hydroxytamoxifen             | Sigma              | H7904              |
|          | Flutamide                      | Sigma              | F9397              |
|          | Leflunomide                    | Sigma              | L5025              |
|          | Mexiletine-HCl                 | Sigma              | M2727              |
|          | Nimodipine                     | Sigma              | N149               |
|          | Omeprazole                     | Sigma              | O104               |
|          | Sulindac                       | Sigma              | S8139              |
|          | 1,4-Dihydroxy-2-naphthoic acid | Sigma              | 281255             |
|          | Tryptamine                     | Sigma              | 193747             |
|          | Quercetin                      | Sigma              | Q4951              |
|          | $\beta$ -naphthoflavone        | Sigma              | N3633              |
|          | Tranilast                      | LKT Laboratories   | T6902              |
|          | Esomeprazole potassium         | LKT Laboratories   | E7357              |

**Table S2.** RT-PCR Primers.

| Species | Name   | Forward (5'–3')       | Reverse (5'–3')       |
|---------|--------|-----------------------|-----------------------|
| Human   | CYP1A1 | GACCACAACCACCAAGAAG   | AGCGAAGAATAGGGATGAAG  |
|         | CYP1B1 | TATCACTGACATCTTCGGCG  | ACCTGATCCAATTCTGCCTG  |
|         | CXCL12 | TGGGCTCCTACTGTAAGGGTT | TTGACCCGAAGCTAAAGTGG  |
|         | CXCR4  | TTTTCTTCACGGAAACAGGG  | GTTACCATGGAGGGGATCAG  |
|         | MMP9   | TTGGTCCACCTGGTTCAACT  | ACGACGTCTTCCAGTACCGA  |
|         | TIPARP | ACACGTTCATGGCATTCAAA  | TCTCAGGAGCACTTGGAAAGA |
|         | TBP    | GATCAGAACAACAGCCTGCC  | TTCTGAATAGGCTGTGGGGT  |

**Table S3.** Treatment of Early Stage GBM PDX 15-037 with Omeprazole.

| Treatment    | Drug Route | Dose Schedule               | Total Dose mg/kg | % Body Wt. Loss at Nadir | % T/C | Log Cell Kill | Tumor Free on day 35 | Activity Rating |
|--------------|------------|-----------------------------|------------------|--------------------------|-------|---------------|----------------------|-----------------|
| No treatment | —          | —                           | —                | 0                        | —     | —             | 0/5                  | —               |
| Omeprazole   | PO         | QD3-20, 27;<br>B.I.D: 21–26 | 3100             | –1                       | 41.9  | 0.7           | 0/6                  | Active (+)      |

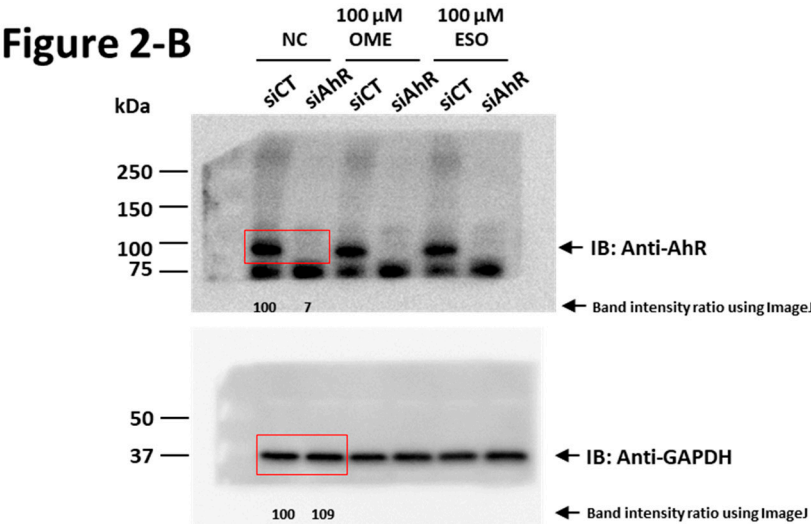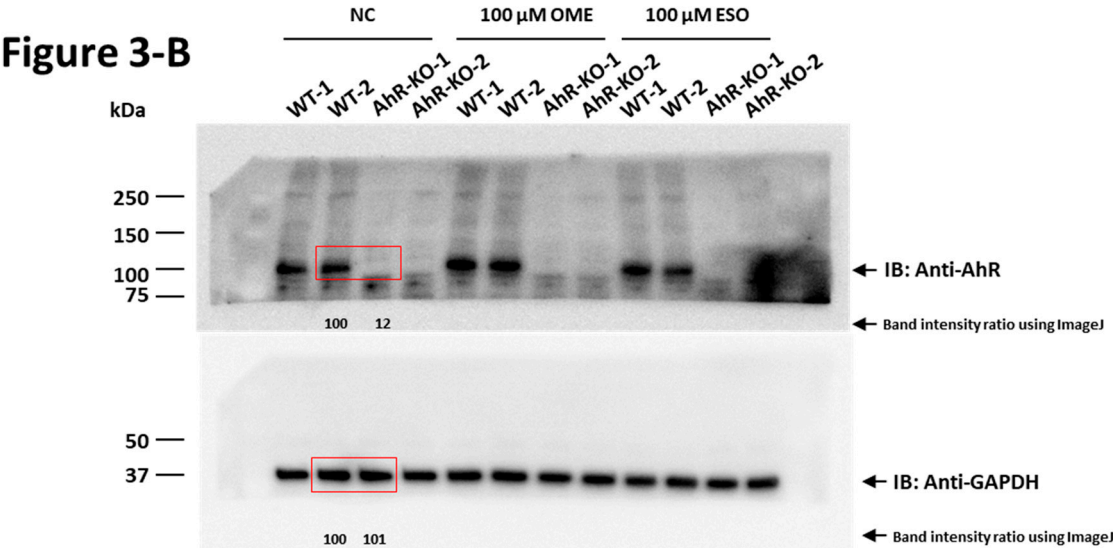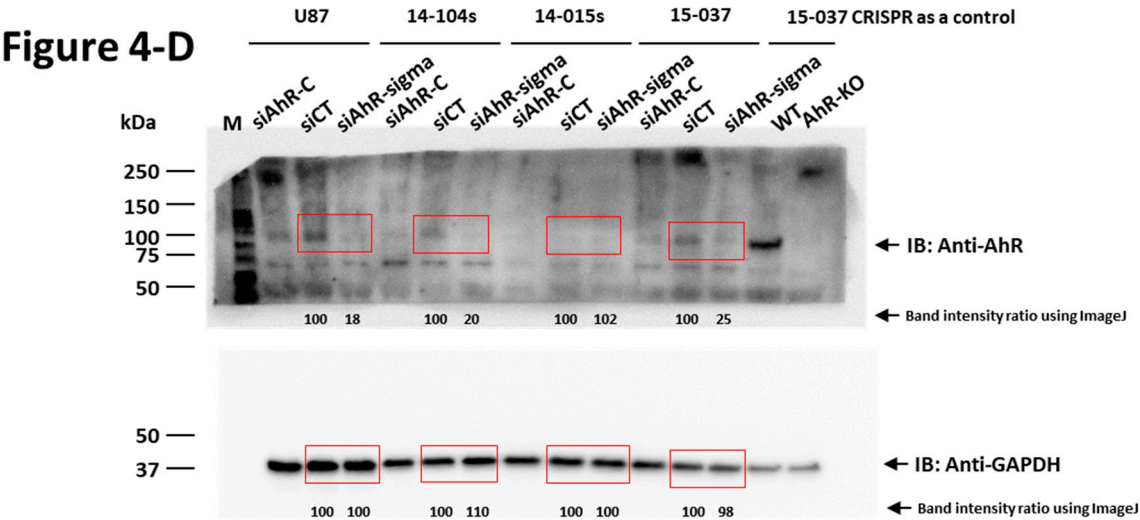

Supplemental Materials: the uncropped Western blot
